# Supplementary material
Source: PubMed Central journal article supplement (PMC2761728)
Supplement: bi900695e_si_001.pdf [file bi900695e_si_001.pdf]

**The *cis*-(5*R*,6*S*)-Thymine Glycol Lesion Occupies the Wobble Position When Mismatched with dG in DNA**

Revised Manuscript

Supporting Information

Kyle L. Brown, Ashis K. Basu<sup>§</sup>, and Michael P. Stone\*

Department of Chemistry and Center in Molecular Toxicology, Vanderbilt University, Nashville, Tennessee 37235, and <sup>§</sup>Department of Chemistry, University of Connecticut, Storrs, Connecticut 06269.

\*Author to whom correspondence should be addressed.

Michael P. Stone

Telephone 615-322-2589

FAX 615-322-7591

email: michael.p.stone@vanderbilt.edu

Running Title: Wobble *cis*-(5*R*,6*S*)-Thymine Glycol:G Pairing

**Table S1.** Helicoidal Analysis of the Oligodeoxynucleotide Duplex Containing the Tg<sup>6</sup>•G<sup>19</sup> Mismatch.

## (a) Global Base-Axis Parameters

| Residue         | Xdisp | Ydisp | Incline | Tip     | Residue         | Xdisp | Ydisp | Incline | Tip     |
|-----------------|-------|-------|---------|---------|-----------------|-------|-------|---------|---------|
|                 | (dx)  | (dy)  | (eta)   | (theta) |                 | (dx)  | (dy)  | (eta)   | (theta) |
| G <sup>1</sup>  | -1.18 | -0.13 | -8.04   | -1.14   | C <sup>24</sup> | -1.11 | 0.09  | -0.18   | -12.59  |
| T <sup>2</sup>  | -0.84 | -0.64 | -10.0   | -5.14   | A <sup>23</sup> | -0.72 | 0.65  | -0.97   | -11.64  |
| G <sup>3</sup>  | -1.22 | -0.18 | -0.69   | -1.82   | C <sup>22</sup> | -1.31 | 0.21  | -4.26   | -12.69  |
| C <sup>4</sup>  | -0.93 | -0.77 | -7.84   | -10.16  | G <sup>21</sup> | -0.86 | 0.83  | 1.10    | -10.24  |
| G <sup>5</sup>  | -1.66 | -0.37 | 1.54    | 4.98    | C <sup>20</sup> | -1.49 | 0.44  | -8.24   | -4.73   |
| Tg <sup>6</sup> | 0.64  | -0.58 | -10.62  | -20.57  | G <sup>19</sup> | -1.29 | 1.13  | -9.29   | -14.89  |
| G <sup>7</sup>  | -1.76 | -0.58 | -7.40   | -1.00   | C <sup>18</sup> | -1.59 | 0.69  | 1.32    | -20.78  |
| T <sup>8</sup>  | -1.20 | -0.63 | -9.46   | -1.17   | A <sup>17</sup> | -0.99 | 0.82  | 1.00    | -12.02  |
| T <sup>9</sup>  | -1.59 | -0.78 | 0.33    | -3.14   | A <sup>16</sup> | -1.32 | 0.84  | 1.85    | -14.29  |
| T <sup>10</sup> | -1.40 | -0.48 | 8.90    | -1.34   | A <sup>15</sup> | -1.21 | 0.61  | -8.35   | -18.64  |
| G <sup>11</sup> | -1.39 | -0.68 | -10.61  | -0.42   | C <sup>14</sup> | -1.41 | 0.86  | 8.15    | -10.24  |
| T <sup>12</sup> | -1.53 | -0.75 | 0.79    | 8.24    | A <sup>13</sup> | -1.37 | 0.75  | 2.73    | -11.05  |

## (b) Global Base pair - Axis Parameters

| Residues                        | Xdisp | Ydisp | Incline | Tip     |
|---------------------------------|-------|-------|---------|---------|
|                                 | (dx)  | (dy)  | (eta)   | (theta) |
| G <sup>1</sup> -C <sup>24</sup> | -1.15 | -0.11 | -4.11   | 5.73    |
| T <sup>2</sup> -A <sup>23</sup> | -0.78 | -0.65 | -5.49   | 3.25    |
| G <sup>3</sup> -C <sup>22</sup> | -1.27 | -0.19 | -2.47   | 5.43    |
| C <sup>4</sup> -G <sup>21</sup> | -0.90 | -0.80 | -3.37   | 0.04    |

|                                  |       |       |       |       |
|----------------------------------|-------|-------|-------|-------|
| G <sup>5</sup> -C <sup>20</sup>  | -1.58 | -0.41 | -3.35 | 4.86  |
| Tg <sup>6</sup> -G <sup>19</sup> | -0.33 | -0.86 | -9.96 | -2.84 |
| G <sup>7</sup> -C <sup>18</sup>  | -1.68 | -0.63 | -3.04 | 9.89  |
| T <sup>8</sup> -A <sup>17</sup>  | -1.09 | -0.72 | -4.23 | 5.42  |
| T <sup>9</sup> -A <sup>16</sup>  | -1.46 | -0.81 | 1.09  | 5.57  |
| T <sup>10</sup> -A <sup>15</sup> | -1.30 | -0.55 | 0.28  | 8.65  |
| G <sup>11</sup> -C <sup>14</sup> | -1.40 | -0.77 | -1.23 | 4.91  |
| T <sup>12</sup> -A <sup>13</sup> | -1.45 | -0.75 | 1.76  | 9.65  |
| Average:                         | -1.2  | -0.6  | -2.84 | 5.05  |

## (c) Global Base-Base Parameters

| Residues                         | Shear<br>(Sx) | Stretch<br>(Sy) | Stagger<br>(Sz) | Buckle<br>(kappa) | Propeller<br>(omega) | Opening<br>(sigma) |
|----------------------------------|---------------|-----------------|-----------------|-------------------|----------------------|--------------------|
| G <sup>1</sup> -C <sup>24</sup>  | -0.07         | -0.05           | -0.04           | -7.87             | -13.73               | 0.47               |
| T <sup>2</sup> -A <sup>23</sup>  | -0.11         | 0.01            | 0.54            | -9.03             | -16.78               | -0.11              |
| G <sup>3</sup> -C <sup>22</sup>  | 0.08          | 0.03            | 0.07            | 3.58              | -14.51               | -1.38              |
| C <sup>4</sup> -G <sup>21</sup>  | -0.07         | 0.06            | 0.32            | -8.94             | -20.41               | -1.92              |
| G <sup>5</sup> -C <sup>20</sup>  | -0.16         | 0.07            | 0               | 9.78              | 0.25                 | -0.44              |
| Tg <sup>6</sup> -G <sup>19</sup> | 1.93          | 0.55            | 1.36            | -1.33             | -35.46               | 27.57              |
| G <sup>7</sup> -C <sup>18</sup>  | -0.17         | 0.11            | 0.05            | -8.73             | -21.78               | 1.72               |
| T <sup>8</sup> -A <sup>17</sup>  | -0.21         | 0.19            | 0.22            | -10.46            | -13.18               | 4.95               |
| T <sup>9</sup> -A <sup>16</sup>  | -0.28         | 0.06            | -0.48           | -1.51             | -17.42               | 2.29               |
| T <sup>10</sup> -A <sup>15</sup> | -0.19         | 0.13            | -0.42           | 17.25             | -19.98               | 2.83               |
| G <sup>11</sup> -C <sup>14</sup> | 0.02          | 0.18            | -0.13           | -18.77            | -10.67               | 2.87               |

|                 |       |      |      |       |        |      |
|-----------------|-------|------|------|-------|--------|------|
| $T^{12}-A^{13}$ | -0.17 | 0    | 0    | -1.94 | -2.81  | 0.51 |
| Average:        | 0.05  | 0.11 | 0.12 | -3.16 | -15.54 | 3.28 |

## (d) Global Inter-Base Parameters

|                 | Shift<br>(Dx) | Slide<br>(Dy) | Rise<br>(Dz) | Tilt<br>(tau) | Roll<br>(rho) | Twist<br>(Omega) |
|-----------------|---------------|---------------|--------------|---------------|---------------|------------------|
| $G^1/T^2$       | 0.21          | -0.55         | 3.80         | -0.88         | -3.48         | 36.31            |
| $T^2/G^3$       | -0.67         | 0.41          | 2.90         | 11.74         | 2.90          | 32.23            |
| $G^3/C^4$       | -0.19         | -0.54         | 3.76         | -6.20         | -1.84         | 34.43            |
| $C^4/G^5$       | -0.34         | 0.62          | 2.71         | 8.90          | 25.15         | 27.34            |
| $G^5/Tg^6$      | 2.97          | -0.37         | 5.01         | -6.60         | -23.43        | 52.39            |
| $Tg^6/G^7$      | -3.13         | -0.55         | 2.54         | 6.56          | 25.53         | 15.61            |
| $G^7/T^8$       | 0.02          | -0.26         | 3.49         | 1.96          | 5.25          | 27.65            |
| $T^8/T^9$       | -0.33         | -0.16         | 2.76         | 14.00         | 4.49          | 31.3             |
| $T^9/T^{10}$    | 0.19          | 0.54          | 2.86         | 11.54         | 11.24         | 32.7             |
| $T^{10}/G^{11}$ | 0.10          | -0.36         | 4.45         | -15.84        | 3.06          | 40.1             |
| $G^{11}/T^{12}$ | -0.23         | -0.28         | 3.08         | 14.26         | 9.24          | 27.89            |

|                 | Shift<br>(Dx) | Slide<br>(Dy) | Rise<br>(Dz) | Tilt<br>(tau) | Roll<br>(rho) | Twist<br>(Omega) |
|-----------------|---------------|---------------|--------------|---------------|---------------|------------------|
| $C^{24}/A^{23}$ | 0.25          | 0.60          | 3.22         | 0.28          | 0.43          | 36.88            |
| $A^{23}/C^{22}$ | -0.86         | -0.39         | 3.36         | -0.86         | -0.63         | 33.50            |
| $C^{22}/G^{21}$ | -0.03         | 0.57          | 3.51         | 6.32          | -4.06         | 34.98            |
| $G^{21}/C^{20}$ | -0.24         | -0.61         | 3.04         | -9.83         | -4.49         | 25.86            |

|                 |       |       |      |       |        |       |
|-----------------|-------|-------|------|-------|--------|-------|
| $C^{20}/A^{19}$ | 0.88  | 0.85  | 3.65 | 4.51  | -12.29 | 24.38 |
| $A^{19}/C^{18}$ | -1.03 | 0.11  | 3.84 | 13.95 | -11.85 | 41.46 |
| $C^{18}/A^{17}$ | 0.06  | 0.34  | 3.32 | 3.69  | 3.35   | 24.42 |
| $A^{17}/A^{16}$ | -0.26 | 0.03  | 3.47 | 5.06  | -8.73  | 33.96 |
| $A^{16}/A^{15}$ | 0.10  | -0.46 | 2.80 | -7.22 | -13.79 | 32.16 |
| $A^{15}/C^{14}$ | -0.11 | 0.40  | 4.15 | 20.18 | 6.25   | 40.06 |
| $C^{14}/A^{13}$ | -0.05 | 0.10  | 2.95 | -2.56 | -1.38  | 30.25 |

## (e) Global Inter-Base Parameters

|                 | Shift | Slide | Rise | Tilt  | Roll  | Twist   |
|-----------------|-------|-------|------|-------|-------|---------|
|                 | (Dx)  | (Dy)  | (Dz) | (tau) | (rho) | (Omega) |
| $G^1/T^2$       | 0.23  | -0.57 | 3.51 | -0.30 | -1.95 | 36.59   |
| $T^2/G^3$       | -0.77 | 0.4   | 3.13 | 5.44  | 1.77  | 32.86   |
| $G^3/C^4$       | -0.11 | -0.55 | 3.64 | 0.06  | 1.11  | 34.7    |
| $C^4/G^5$       | -0.29 | 0.62  | 2.88 | -0.47 | 14.82 | 26.6    |
| $G^5/Tg^6$      | 1.93  | -0.61 | 4.33 | -1.05 | -5.57 | 38.38   |
| $Tg^6/G^7$      | -2.08 | -0.33 | 3.19 | 10.25 | 18.69 | 28.54   |
| $G^7/T^8$       | 0.04  | -0.30 | 3.41 | 2.82  | 0.95  | 26.03   |
| $T^8/T^9$       | -0.29 | -0.09 | 3.11 | 9.53  | 6.61  | 32.63   |
| $T^9/T^{10}$    | 0.14  | 0.50  | 2.83 | 2.16  | 12.51 | 32.43   |
| $T^{10}/G^{11}$ | -0.01 | -0.38 | 4.30 | 2.17  | -1.60 | 40.08   |
| $G^{11}/T^{12}$ | -0.14 | -0.19 | 3.02 | 5.85  | 5.31  | 29.07   |
| Average:        | -0.12 | -0.14 | 3.39 | 3.32  | 4.79  | 32.54   |

## (f) Local Inter-Base Parameters

|                 | Shift | Slide | Rise | Tilt   | Roll  | Twist   |
|-----------------|-------|-------|------|--------|-------|---------|
|                 | (Dx)  | (Dy)  | (Dz) | (tau)  | (rho) | (Omega) |
| $G^1/T^2$       | 0.64  | -1.67 | 3.58 | 1.16   | -8.89 | 36.03   |
| $T^2/G^3$       | -0.32 | -0.47 | 2.87 | 13.29  | -0.19 | 31.48   |
| $G^3/C^4$       | 0.53  | -1.34 | 3.76 | -2.36  | -3.97 | 35.27   |
| $C^4/G^5$       | 0.03  | -0.25 | 3.00 | 10.14  | 23.06 | 28.02   |
| $G^5/Tg^6$      | 3.94  | -0.80 | 4.57 | 1.84   | -25.4 | 53.95   |
| $Tg^6/G^7$      | -2.51 | -1.04 | 2.95 | 10.55  | 22.22 | 14.95   |
| $G^7/T^8$       | 0.37  | -1.46 | 3.40 | 2.69   | 1.07  | 28.06   |
| $T^8/T^9$       | 0.10  | -1.10 | 2.80 | 14.99  | 1.96  | 31.37   |
| $T^9/T^{10}$    | 0.55  | -0.08 | 3.10 | 12.75  | 13.58 | 31.63   |
| $T^{10}/G^{11}$ | 0.81  | -1.37 | 4.42 | -13.99 | 2.3   | 40.66   |
| $G^{11}/T^{12}$ | -0.16 | -1.29 | 2.96 | 12.05  | 6.47  | 28.95   |
|                 | Shift | Slide | Rise | Tilt   | Roll  | Twist   |
|                 | (Dx)  | (Dy)  | (Dz) | (tau)  | (rho) | (Omega) |
| $C^{24}/A^{23}$ | -0.18 | -1.18 | 3.25 | -7.30  | -0.74 | 36.18   |
| $A^{23}/C^{22}$ | -1.22 | -0.36 | 3.15 | -7.66  | -0.94 | 32.58   |
| $C^{22}/G^{21}$ | -0.49 | -1.26 | 3.56 | -0.84  | 3.21  | 35.67   |
| $G^{21}/C^{20}$ | -0.30 | -0.09 | 3.25 | -12.8  | 3.03  | 25.03   |
| $C^{20}/A^{19}$ | 0.63  | -1.90 | 3.53 | 0.03   | 8.98  | 24.94   |
| $A^{19}/C^{18}$ | -1.54 | -1.56 | 3.54 | -0.68  | 8.97  | 43.87   |
| $C^{18}/A^{17}$ | -0.60 | -0.77 | 3.39 | -3.41  | -2.54 | 24.29   |

|                 |       |       |      |        |       |       |
|-----------------|-------|-------|------|--------|-------|-------|
| $A^{17}/A^{16}$ | -0.54 | -0.64 | 3.52 | -2.91  | 9.59  | 34.06 |
| $A^{16}/A^{15}$ | -0.23 | -0.45 | 3.02 | -16.05 | 11.75 | 29.57 |
| $A^{15}/C^{14}$ | -0.77 | -1.18 | 4.15 | 8.66   | -5.58 | 43.98 |
| $C^{14}/A^{13}$ | -0.13 | -0.57 | 3.02 | -7.84  | 4.22  | 29.14 |

## (g) Local Inter-Base pair Parameters

|                 | Shift<br>(Dx) | Slide<br>(Dy) | Rise<br>(Dz) | Tilt<br>(tau) | Roll<br>(rho) | Twist<br>(Omega) |
|-----------------|---------------|---------------|--------------|---------------|---------------|------------------|
| $G^1/T^2$       | 0.20          | -1.41         | 3.44         | -3.12         | -4.81         | 36.60            |
| $T^2/G^3$       | -0.75         | -0.42         | 3.03         | 2.84          | -0.65         | 32.18            |
| $G^3/C^4$       | 0             | -1.31         | 3.69         | -1.66         | -0.36         | 35.95            |
| $C^4/G^5$       | -0.12         | -0.17         | 3.10         | -1.38         | 13.02         | 26.42            |
| $G^5/Tg^6$      | 2.09          | -1.20         | 4.31         | 3.06          | -8.04         | 38.76            |
| $Tg^6/G^7$      | -1.90         | -1.38         | 3.04         | 4.03          | 16.19         | 30.10            |
| $G^7/T^8$       | -0.12         | -1.10         | 3.45         | -0.40         | -0.68         | 26.21            |
| $T^8/T^9$       | -0.18         | -0.88         | 3.17         | 6.20          | 5.97          | 33.07            |
| $T^9/T^{10}$    | 0.15          | -0.26         | 3.07         | -1.73         | 13.24         | 30.77            |
| $T^{10}/G^{11}$ | 0             | -1.25         | 4.34         | -2.82         | -1.97         | 42.43            |
| $G^{11}/T^{12}$ | -0.15         | -0.93         | 3.00         | 2.10          | 5.44          | 28.75            |
| Average:        | -0.07         | -0.94         | 3.42         | 0.65          | 3.4           | 32.84            |

## (h) Global Axis Curvature

|           | Ax    | Ay    | Ainc | Atip | Adis | Angle | Path |
|-----------|-------|-------|------|------|------|-------|------|
| $G^1/T^2$ | -0.14 | -0.04 | 1.07 | 0.52 | 0.14 | 1.19  | 3.51 |

|                                  |       |       |       |       |      |       |      |
|----------------------------------|-------|-------|-------|-------|------|-------|------|
| T <sup>2</sup> /G <sup>3</sup>   | -0.28 | -0.06 | 2.43  | -0.41 | 0.29 | 2.46  | 3.14 |
| G <sup>3</sup> /C <sup>4</sup>   | -0.48 | 0.05  | 0.96  | 6.50  | 0.48 | 6.57  | 3.66 |
| C <sup>4</sup> /G <sup>5</sup>   | 0.39  | 0.23  | -0.49 | 10.01 | 0.45 | 10.02 | 2.90 |
| G <sup>5</sup> /Tg <sup>6</sup>  | 0.68  | -0.16 | 5.56  | 2.13  | 0.70 | 5.95  | 4.38 |
| Tg <sup>6</sup> /G <sup>7</sup>  | -0.73 | -0.55 | 3.33  | 5.96  | 0.92 | 6.83  | 3.31 |
| G <sup>7</sup> /T <sup>8</sup>   | -0.55 | -0.21 | 4.02  | 5.41  | 0.59 | 6.74  | 3.45 |
| T <sup>8</sup> /T <sup>9</sup>   | 0.07  | 0     | 4.21  | 6.46  | 0.07 | 7.71  | 3.11 |
| T <sup>9</sup> /T <sup>10</sup>  | -0.01 | 0.23  | 2.97  | 9.43  | 0.23 | 9.89  | 2.83 |
| T <sup>10</sup> /G <sup>11</sup> | 0.09  | -0.15 | 3.68  | 2.15  | 0.17 | 4.26  | 4.30 |
| G <sup>11</sup> /T <sup>12</sup> | -0.09 | -0.21 | 2.86  | 0.57  | 0.23 | 2.92  | 3.02 |

## (i) Backbone Parameters

|                 | C1'-C2' | C2'-C3' | Phase  | Amplitude | Pucker       | C1'   | C2'   | C3'   |
|-----------------|---------|---------|--------|-----------|--------------|-------|-------|-------|
| G <sup>1</sup>  | 25.89   | -21.79  | 146.11 | 25.81     | C2'-<br>endo | 100.8 | 112.0 | 101.6 |
| T <sup>2</sup>  | 14.21   | 2.22    | 85.48  | 28.91     | O1'-<br>endo | 103.7 | 108.1 | 104.9 |
| G <sup>3</sup>  | 31.85   | -31.78  | 162.66 | 33.66     | C2'-<br>endo | 104.0 | 103.8 | 103.0 |
| C <sup>4</sup>  | 11.85   | 4.52    | 80.64  | 28.22     | O1'-<br>endo | 103.7 | 108.2 | 105.2 |
| G <sup>5</sup>  | 36.80   | -34.41  | 156.84 | 37.85     | C2'-<br>endo | 103.3 | 103.0 | 102.7 |
| Tg <sup>6</sup> | -2.95   | 24.63   | 51.19  | 39.79     | C4'-exo      | 104.9 | 105.5 | 102.4 |
| G <sup>7</sup>  | 28.45   | -27.68  | 159.64 | 29.72     | C2'-<br>endo | 104.0 | 104.9 | 103.9 |
| T <sup>8</sup>  | -3.94   | 18.38   | 47.22  | 27.08     | C4'-exo      | 103.8 | 109.7 | 103.7 |



|                 |        |        |        |       |              |       |       |       |
|-----------------|--------|--------|--------|-------|--------------|-------|-------|-------|
| T <sup>9</sup>  | 6.24   | 4.42   | 75.7   | 18.07 | O1'-<br>endo | 103.6 | 111.3 | 104.9 |
| T <sup>10</sup> | 32.42  | -30.79 | 157.98 | 33.56 | C2'-<br>endo | 103.7 | 103.9 | 103.3 |
| G <sup>11</sup> | -4.89  | 21.16  | 46.51  | 31.04 | C4'-exo      | 104.3 | 108.4 | 103.2 |
| T <sup>12</sup> | -10.77 | 25.61  | 36.41  | 32.26 | C4'-exo      | 104.8 | 107.2 | 101.1 |

|                 | Chi     | Gamma   | Delta   | Epsilon | Zeta    | Alpha  | Beta    |
|-----------------|---------|---------|---------|---------|---------|--------|---------|
|                 | C1'-N   | C5'-C4' | C4'-C3' | C3'-O3' | O3'-P   | P-O5'  | O5'-C5' |
| G <sup>1</sup>  | -134.41 | -174.37 | 132.03  | -168.86 | -90.08  | -76.62 | 177.21  |
| T <sup>2</sup>  | -140.37 | 62.11   | 101.78  | -173.28 | -92.95  | -68.83 | 178.92  |
| G <sup>3</sup>  | -111.12 | 64.78   | 141.78  | -174.71 | -98.81  | -76.91 | 178.97  |
| C <sup>4</sup>  | -135.23 | 57.70   | 100.26  | -158.97 | -84.65  | -80.24 | 175.59  |
| G <sup>5</sup>  | -106.31 | 62.44   | 142.01  | -177.25 | -91.25  | -67.53 | 167.46  |
| Tg <sup>6</sup> | -146.28 | 76.68   | 81.32   | -168.77 | -91.09  | -75.17 | -170.79 |
| G <sup>7</sup>  | -115.91 | 60.65   | 138.03  | -166.50 | -108.8  | 124.65 | -165.23 |
| T <sup>8</sup>  | -152.99 | -171.89 | 96.99   | -162.78 | -79.83  | -77.60 | 175.30  |
| T <sup>9</sup>  | -132.81 | 66.74   | 108.14  | -164.28 | -84.70  | -74.75 | 176.17  |
| T <sup>10</sup> | -106.08 | 66.31   | 140.26  | -174.29 | -101.79 | -85.01 | 175.95  |
| G <sup>11</sup> | -152.41 | 61.23   | 90.56   | -160.39 | -78.31  | -80.70 | 177.39  |
| T <sup>12</sup> | -140.43 | 61.40   | 90.14   |         |         |        |         |

|                 | C1'-C2' | C2'-C3' | Phase  | Amplitude | Pucker       | C1'   | C2'   | C3'   |
|-----------------|---------|---------|--------|-----------|--------------|-------|-------|-------|
| C <sup>24</sup> | 18.15   | -2.40   | 94.37  | 29.13     | O1'-<br>endo | 103.1 | 109.7 | 101.4 |
| A <sup>23</sup> | 29.38   | -25.97  | 150.42 | 29.97     | C2'-         | 103.4 | 105.2 | 104.2 |

|                 |        |        |        |       | endo         |       |       |       |
|-----------------|--------|--------|--------|-------|--------------|-------|-------|-------|
| C <sup>22</sup> | 39.07  | -30.58 | 141.42 | 39.46 | C1'-exo      | 101.6 | 103.9 | 102.9 |
| G <sup>21</sup> | 31.89  | -34.74 | 169.51 | 35.49 | C2'-<br>endo | 103.5 | 103.3 | 103.1 |
| C <sup>20</sup> | 23.92  | -9.27  | 108.06 | 29.88 | C1'-exo      | 102.0 | 111.1 | 103.3 |
| A <sup>19</sup> | 18.79  | -7.19  | 107.14 | 24.20 | O1'-<br>endo | 103.2 | 109.4 | 105.4 |
| C <sup>18</sup> | 37.42  | -33.59 | 152.68 | 38.15 | C2'-<br>endo | 102.7 | 103.1 | 102.8 |
| A <sup>17</sup> | 37.89  | -32.99 | 150.31 | 38.39 | C2'-<br>endo | 102.8 | 102.9 | 103.0 |
| A <sup>16</sup> | 29.36  | -32.50 | 171.55 | 33.08 | C2'-<br>endo | 104.4 | 104.0 | 103.4 |
| A <sup>15</sup> | -16.53 | 29.98  | 25.80  | 33.62 | C3'-<br>endo | 105.0 | 105.8 | 102.5 |
| C <sup>14</sup> | 33.40  | -25.13 | 137.82 | 34.01 | C1'-exo      | 102.2 | 106.0 | 103.1 |
| A <sup>13</sup> | 25.10  | -22.56 | 152.61 | 25.50 | C2'-<br>endo | 103.3 | 107.3 | 103.1 |

|                 | Chi     | Gamma   | Delta   | Epsilon | Zeta   | Alpha   | Beta    |
|-----------------|---------|---------|---------|---------|--------|---------|---------|
|                 | C1'-N   | C5'-C4' | C4'-C3' | C3'-O3' | O3'-P  | P-O5'   | O5'-C5' |
| C <sup>24</sup> | -121.47 | 58.98   | 107.19  |         |        |         |         |
| A <sup>23</sup> | -150.01 | 168.36  | 136.50  | -151.82 | -83.08 | -93.83  | 177.43  |
| C <sup>22</sup> | -109.14 | 50.17   | 134.81  | -146.21 | -73.21 | -107.58 | 66.46   |
| G <sup>21</sup> | -136.79 | 166.25  | 148.89  | -160.18 | -84.96 | -87.20  | -177.72 |
| C <sup>20</sup> | -132.74 | 56.40   | 114.78  | -127.44 | -71.07 | -106.64 | 65.39   |
| A <sup>19</sup> | -141.67 | -173.94 | 115.21  | -163.74 | -85.63 | -81.47  | -177.89 |

|                 |         |         |        |         |         |         |         |
|-----------------|---------|---------|--------|---------|---------|---------|---------|
| C <sup>18</sup> | -154.27 | 171.61  | 143.70 | -153.35 | -83.40  | 111.82  | -175.06 |
| A <sup>17</sup> | -100.40 | 50.27   | 140.50 | -147.61 | -78.98  | -101.57 | 65.21   |
| A <sup>16</sup> | -113.16 | 71.58   | 146.17 | -168.56 | -94.50  | -79.94  | -173.37 |
| A <sup>15</sup> | -151.13 | 59.41   | 87.57  | -163.13 | -76.18  | -69.35  | 177.54  |
| C <sup>14</sup> | -114.24 | 64.38   | 128.12 | -178.68 | -103.53 | -81.54  | 178.81  |
| A <sup>13</sup> | -109.97 | -175.85 | 129.76 | -173.21 | -98.45  | -75.29  | 172.04  |

---
